# Supplementary material
Source: ML conference proceedings conference paper supplement (https://openaccess.thecvf.com/content/CVPR2022/html/Saha_The_Pedestrian_Next_CVPR_2022_paper.html)
Supplement: Supplementary file 1 [file Saha_The_Pedestrian_Next_CVPR_2022_supplemental.pdf]

# Supplementary Material: “The Pedestrian next to the Lamppost” Adaptive Object Graphs for Better Instantaneous Mapping

Avishkar Saha<sup>1</sup>, Oscar Mendez<sup>1</sup>, Chris Russell<sup>2</sup>, Richard Bowden<sup>1</sup>

<sup>1</sup>Centre for Vision Speech and Signal Processing, University of Surrey, Guildford, UK

<sup>2</sup>Amazon, Tubingen, Germany

{a.saha, o.mendez, r.bowden}@surrey.ac.uk, cmruss@amazon.com

## A. Losses

**Object Network:** Our object network consists of losses applied at different layers within it, as shown in Fig. 1 of the main paper. The initial node embeddings  $\{v_i^0 | i \in \mathcal{V}\}$  of input graph  $\mathcal{G}$  are supervised for object yaw  $\theta$ , dimensions  $\delta = (l, w)$  and label  $c$ . After message-passing across this graph, the updated node embeddings  $\{v_i' | i \in \mathcal{V}\}$  are used for the object’s centroid  $p^v = (x, z)$ , while the updated edge embeddings  $\{e_{ij}' | (i, j) \in \mathcal{E}\}$  are trained to predict the midpoint of the graph’s edges, that is, the midpoint between node  $i$  and  $j$ :  $p^e = (x, z)$ .

The object’s yaw  $\theta$  is a single scalar. However, as mentioned in the main paper, it is difficult to regress. Instead, we follow Mousavian *et al.* [2, 3, 5] and predict the object’s observation angle  $\beta$  as a vector trained with a discrete-continuous loss. First, the observation angle  $\beta$  is defined as follows:

$$\beta = \alpha + \theta, \quad (1)$$

where  $\alpha$  is the viewing angle (the polar angle of the ray). To construct the multi-scalar  $\beta$  encoding, the orientation range  $[-\pi, \pi]$  is discretised into  $n$  overlapping bins. Within each bin, the network estimates the confidence probability  $c_i$  of the observation angle falling within the bin and the residual rotation to the bin center  $m_i$ . The residual rotation is represented by the sine and cosine of the offset to the bin center. This results in 3 parameters for each bin  $i$ :  $(c_i, \sin(\beta_i - m_i), \cos(\beta_i - m_i))$ . The confidence probabilities are trained with a cross-entropy loss and the residuals with a Smooth L1 Loss:

$$L_\beta = \frac{1}{|\mathcal{V}|} \sum_{k=1}^{|\mathcal{V}|} \sum_{i=1}^n CE(\hat{c}_i, c_i) + c_i * SmoothL1(\hat{a}_i, a_i), \quad (2)$$

where  $CE$  is the cross-entropy loss,  $c_i$  is the ground truth binary variable of the angle  $\beta_i$  falling within the bin  $i$ , and  $a_i = (\sin(\beta_i - m_i), \cos(\beta_i - m_i))$ . In practice, we find

$n = 2$  bins sufficient.

The object’s BEV dimensions  $\delta = (l, w)$  are regressed directly with a Smooth L1 Loss:

$$L_{dim} = \frac{1}{|\mathcal{V}|} \sum_{k=1}^{|\mathcal{V}|} SmoothL1(\hat{\delta}_k, \delta_k), \quad (3)$$

where  $\delta_k$  is the object’s length and width in meters. The object’s label  $c$  is supervised with a focal loss [1] for classification:

$$L_c = \frac{1}{|\mathcal{V}|} \sum_{k=1}^{|\mathcal{V}|} -\alpha(1 - p_k)^\gamma \log(p_k), \quad (4)$$

where  $p_k$  is the class probability of a predicted object. We follow the hyperparameter settings of the paper, with  $\alpha = 0.25$  and  $\gamma = 2$ .

To predict each object’s centroid  $p^v = (x, z)$ , we regress its viewing angle  $\alpha$  and depth  $z$  directly using Eq. 3. The  $x$ -value of the centroid is recovered using both  $\alpha$  and  $z$ . We follow the same procedure for the midpoint of each edge  $p^e = (x, z)$ .

**Scene Network:** To supervise our scene network, we follow Saha *et al.* [4] and apply a Dice loss to each BEV map  $M_u^{BEV}$  generated at scale  $u$ . In total, the multi-scale Dice loss across all scales  $U$  is defined as:

$$L_{scene} = 1 - \frac{1}{C} \sum_{u=1}^U \sum_{c=1}^C \frac{2 \sum_i^N \hat{m}_i^c m_i^c}{\sum_i^N \hat{m}_i^c + m_i^c + \epsilon}, \quad (5)$$

where  $\hat{m}_i^c$  is the predicted sigmoid output of the network at scale  $u$ ,  $m_i^c$  is the ground truth binary variable at scale  $u$  and  $\epsilon$  is a constant which prevents division by zero.

## References

- [1] Tsung-Yi Lin, Priya Goyal, Ross Girshick, Kaiming He, and Piotr Dollár. Focal loss for dense object detection. In *Proceedings of the IEEE international conference on computer vision*, pages 2980–2988, 2017. 1

- [2] Lijie Liu, Jiwen Lu, Chunjing Xu, Qi Tian, and Jie Zhou. Deep fitting degree scoring network for monocular 3d object detection. In *Proceedings of the IEEE/CVF Conference on Computer Vision and Pattern Recognition*, pages 1057–1066, 2019. [1](#)
- [3] Arsalan Mousavian, Dragomir Anguelov, John Flynn, and Jana Kosecka. 3d bounding box estimation using deep learning and geometry. In *Proceedings of the IEEE Conference on Computer Vision and Pattern Recognition*, pages 7074–7082, 2017. [1](#)
- [4] Avishkar Saha, Oscar Mendez, Chris Russell, and Richard Bowden. Enabling spatio-temporal aggregation in birds-eye-view vehicle estimation. In *Proceedings of the International Conference on Robotics and Automation*, 2021. [1](#)
- [5] Xingyi Zhou, Dequan Wang, and Philipp Krähenbühl. Objects as points. In *arXiv preprint arXiv:1904.07850*, 2019. [1](#)
